# Supplementary material for: Activities of Cefiderocol with Simulated Human Plasma Concentrations against Carbapenem-Resistant Gram-Negative Bacilli in an In Vitro Chemostat Model
Source: PubMed Central journal article supplement (PMC7577172; doi:10.1128/aac.01128-20), 2020-10-20
Supplement: AAC.01128-20-s0001.pdf [file AAC.01128-20-s0001.pdf]

1 **Materials and Methods**

2 **Antimicrobial agents**

3 Total of 4 antimicrobial agents were used in this study. Cefiderocol was synthesized by  
4 Shionogi & Co., Ltd. (Osaka, Japan). Colistin sulfate was obtained from Wako pure  
5 chemical industries, Ltd. (Osaka, Japan). Amikacin and meropenem were obtained from  
6 USP (Rockville, MD).

7

8 **Test organisms**

9 Six clinical isolates (2 *P. aeruginosa*, 1 *A. baumannii*, 1 *E. coli*, and 2 *K. pneumoniae*)  
10 were used in this study. All these isolates harbored at least 1 carbapenemase such as  
11 VIM, IMP, OXA-23, NDM, and KPC. MIC studies were conducted with three  
12 replicates, and the modal MICs were represented. For cefiderocol, iron-depleted (ID)  
13 cation-adjusted Mueller Hinton broth (CAMHB) with zinc concentration of 0.65 µg/ml  
14 was used as the test medium (1, 2). MICs of cefiderocol were 0.5 to 4 µg/ml. MICs of  
15 colistin, amikacin, and meropenem were determined by using broth microdilution  
16 method according to CLSI guidelines (2). MICs of colistin in combination with 4 µg/ml  
17 amikacin were 0.125 to 2 µg/ml. All test strains showed colistin-susceptible profile with  
18 colistin MIC of  $\leq 2$  µg/ml, however, those isolates were meropenem- and amikacin-  
19 resistant profiles. MICs of meropenem and amikacin were  $\geq 16$  µg/ml.

20

21 ***In vitro* pharmacodynamic model**

22 We used a one-compartment *in vitro* chemostat model which is the auto-simulation  
23 Shionogi dilution-type equipment (3) modified the model described by Grasso et al. (4).

24 The concentration-time curves were simulated by addition of the antimicrobial solution  
25 cooled at 4°C to the bacterial suspension or by dilution of the bacterial suspension with  
26 the test medium. To keep the volume of bacterial culture constant (50 ml), the culture  
27 solution was automatically removed under computer control. The bacterial suspension  
28 was prepared as follows. Overnight culture grown on tryptic soy agar plate was  
29 suspended in saline, and then measured the optical density at 625 nm (OD<sub>625</sub>) by  
30 spectrophotometer. In this study, the number of bacterial cells was assumed to be  $1 \times 10^8$   
31 colony-forming unit (CFU)/ml when OD<sub>625</sub> was 0.1. The bacterial suspension was  
32 diluted with ID-CAMHB to prepare the bacterial suspensions of  $5.20 \times 10^5$  to  $5.79 \times 10^5$   
33 CFU/ml.

34 The antimicrobial solution was prepared as follows. Cefiderocol was dissolved and  
35 diluted with saline to make 1000 µg/ml solution. Colistin and amikacin were dissolved  
36 with distilled water and further diluted with saline to make 1000 µg/ml and 350 µg/ml  
37 solutions, respectively. Meropenem was dissolved with 50 mM 3-(N-morpholino)  
38 propanesulfonic acid buffer (pH7.0) and further diluted with saline to make 760 µg/ml  
39 solution. In this study, the simulated human plasma concentrations in total 3 treatment  
40 regimen (cefiderocol, colistin in combination with amikacin, and meropenem) were  
41 recreated in the bacteria culture. Cefiderocol concentrations after intravenous  
42 administration of 2g cefiderocol as a 3-h infusion at 8-h intervals over 24 h were  
43 simulated based on the plasma concentrations after single intravenous administration of  
44 2 g cefiderocol as a 1-h infusion to healthy volunteers (5), and then these concentrations  
45 were corrected by the reported plasma protein binding ratio in humans (58%) (6).  
46 Concentration curve of colistin was based on the 2.5 mg/kg colistin methanesulfonate

47 sodium single dose treatment administered as a 0.5-h infusion (7). The plasma  
48 concentrations-time curve of amikacin is based on the 5 mg/kg single dose treatment  
49 administered as a 0.5-h infusion (8). In the case of colistin, appropriate dosing regimens  
50 can be designed for validation in clinical setting with robust pharmacokinetics (PK) and  
51 pharmacodynamics (PD) data and associated PK/PD modeling by using the total drug  
52 concentration (9). The optimal initial dosing regimen of amikacin in clinical was set by  
53 PK/PD with total drug concentration (10). Meropenem concentrations after intravenous  
54 administration of 1g meropenem as a 1-h infusion at 8-h intervals over 24 h were  
55 simulated based on the plasma concentrations after single intravenous administration of  
56 1 g meropenem to healthy volunteers (11), and then these concentrations were corrected  
57 by the reported plasma protein binding ratio in humans (12.8%) (12). The PK  
58 parameters to recreate the human plasma concentrations in the auto-simulation Shionogi  
59 dilution- type system were calculated by compartment model analysis. Each PK  
60 parameter is shown in Table S1.

61 Bacteria suspension was incubated at 37°C over 24 h under each simulated human  
62 plasma concentrations-time curve. A 0.5 ml of the bacterial culture was collected at 1, 3,  
63 5, 24 h for vehicle treatment and 2 h intervals over 24 h for drug treatment, diluted with  
64 4.5 ml of test medium supplemented with 1 mg/ml ferric ammonium citrate, and then  
65 stored at 4°C until determination of the viable cell counts. Collected samples were 10-  
66 fold serially diluted with saline or ID-CAMHB. A 0.01 or 0.1 to 0.5 ml of diluted  
67 bacterial cell suspensions were incubated in test medium or on agar plate (cation-  
68 adjusted Mueller Hinton agar plate for meropenem and colistin/amikacin treatment or  
69 ID-cation-adjusted Mueller Hinton agar for cefiderocol treatment) supplemented with 1

70 mg/ml ferric ammonium citrate, respectively, and then, the number of the colonies was  
71 counted. The effect of the carry-over of the antibiotics from the culture was considered  
72 to be negligible as the final concentration of the agar medium was below sub-MIC,  
73 which was confirmed by the results of serially diluted samples. When the number of  
74 viable cells per 1 ml of the bacterial suspension is 0, the value of  $\log_{10}$  CFU/ml  
75 represents 1.

76 Table S1 Pharmacokinetic parameters of cefiderocol, colistin, amikacin, and meropenem

| Drug        | Human dosing regimen                                               | Pharmacokinetic parameters |                             |                            |                        |
|-------------|--------------------------------------------------------------------|----------------------------|-----------------------------|----------------------------|------------------------|
|             |                                                                    | Vc (L)                     | $\alpha$ (h <sup>-1</sup> ) | $\beta$ (h <sup>-1</sup> ) | kel (h <sup>-1</sup> ) |
| Cefiderocol | 2 g every 8-h as a 3-h infusion                                    | 9.846                      | 0.763                       | 0.268                      | 0.518                  |
| Colistin*   | 2.5 mg/kg colistin methanesulfonate every 12-h as a 0.5-h infusion | 1.694                      | 0.602                       | 0.313                      | 0.097                  |
| Amikacin*   | 5 mg/kg every 8-h as a 0.5-h infusion                              | 14.95                      | NA                          | NA                         | 0.610                  |
| Meropenem   | 1 g every 8-h as a 1-h infusion                                    | 9.407                      | 6.67                        | 0.856                      | 1.79                   |

77 \*: Colistin in combination with amikacin was evaluated in a one-compartment *in vitro* chemostat model.

78 Vc: distribution volume of central compartment,  $\alpha$ : elimination rate constant in the distribution phase,  $\beta$ : elimination rate constant in the  
 79 terminal phase, kel: elimination rate constant from central compartment, NA: not applicable.

80

81 Table S2 Change of viable cells from the initial inoculum after cefiderocol, colistin/amikacin, and meropenem treatment after 24 h  
 82 treatment

| Strain               | Initial inoculum | Change of log <sub>10</sub> CFU/ml from the initial inoculum after 24 h treatment |                   |           |
|----------------------|------------------|-----------------------------------------------------------------------------------|-------------------|-----------|
|                      |                  | Cefiderocol                                                                       | Colistin/Amikacin | Meropenem |
| <i>P. aeruginosa</i> |                  |                                                                                   |                   |           |
| NUBL-7808            | 5.59 ± 0.08      | -4.51                                                                             | -2.59             | +1.79     |
| SR27001              | 5.20 ± 0.00      | -3.30                                                                             | -1.57             | +2.49     |
| <i>A. baumannii</i>  |                  |                                                                                   |                   |           |
| SR08626              | 5.45 ± 0.10      | -4.38                                                                             | -2.03             | +2.65     |
| <i>E. coli</i>       |                  |                                                                                   |                   |           |
| DU48916              | 5.79 ± 0.05      | -4.53                                                                             | -4.73             | +2.50     |
| <i>K. pneumoniae</i> |                  |                                                                                   |                   |           |
| SR08667              | 5.76 ± 0.02      | -4.77                                                                             | -4.73             | +2.27     |
| VA-384               | 5.71 ± 0.07      | -4.66                                                                             | -4.79             | +2.67     |

83 CFU: colony-forming units.

84 **References**

85

- 86 1. Clinical and Laboratory Standards Institute (CLSI), 2020. Performance Standards  
87 for Antimicrobial Susceptibility Testing; 30th Edition. CLSI Document M100-  
88 ED30. Clinical and Laboratory Standards Institute, Wayne, PA.
- 89 2. European Committee on Antimicrobial Susceptibility Testing (EUCAST), 2020.  
90 Breakpoints for cefiderocol from EUCAST.  
91 [https://www.eucast.org/fileadmin/src/media/PDFs/EUCAST\\_files/Breakpoint\\_table](https://www.eucast.org/fileadmin/src/media/PDFs/EUCAST_files/Breakpoint_tables/Addenda/Cefiderocol_addendum_20200501.pdf)  
92 [s/Addenda/Cefiderocol\\_addendum\\_20200501.pdf](https://www.eucast.org/fileadmin/src/media/PDFs/EUCAST_files/Breakpoint_tables/Addenda/Cefiderocol_addendum_20200501.pdf).
- 93 3. Homma T, Hori T, Ohshiro M, Maki H, Yamano Y, Shimada J, Kuwahara S. 2010.  
94 In vitro pharmacokinetic and pharmacodynamic evaluation of S-013420 against  
95 Haemophilus influenzae and Streptococcus pneumoniae. Antimicrob Agents  
96 Chemother Oct;54(10):4300-5.
- 97 4. Grasso S, Meinardi G, de Carneri I, Tamassia V. 1978. New *in vitro* model to study  
98 the effect of antibiotic concentration and rate of elimination on antibacterial  
99 activity. Antimicrob Agents Chemother Apr;13(4):570-6.
- 100 5. Saisho Y, Katsube T, White S, Fukase H, Shimada J. 2018. Pharmacokinetics,  
101 Safety, and Tolerability of Cefiderocol, a Novel Siderophore Cephalosporin for  
102 Gram-Negative Bacteria, in Healthy Subjects. Antimicrobial Agents Chemother Feb  
103 23;62(3):e02163-17.
- 104 6. Matsumoto S, Singley CM, Hoover J, Nakamura R, Echols R, Rittenhouse S, Tsuji  
105 M, Yamano Y. 2017. Efficacy of Cefiderocol against Carbapenem-Resistant Gram-  
106 Negative Bacilli in Immunocompetent-Rat Respiratory Tract Infection Models

- 107       Recreating Human Plasma Pharmacokinetics. *Antimicrob Agents Chemother* Aug  
108       24;61(9):e00700-17.
- 109    7. Mizuyachi K, Hara K, Wakamatsu A, Nohda S, Hirama T. 2011. Safety and  
110       pharmacokinetic evaluation of intravenous colistin methanesulfonate sodium in  
111       Japanese healthy male subjects. *Curr Med Res Opin* Dec;27(12):2261-70.
- 112    8. Grenier B, Autret E, Marchand S, Thompson R. 1987. Kinetic parameters of  
113       amikacin in cystic fibrosis children. *Infection* Jul-Aug;15(4):295-9.
- 114    9. Plachouras D, Karvanen M, Friberg LE, Papadomichelakis E, Antoniadou A,  
115       Tsangaris I, Karaiskos I, Poulakou G, Kontopidou F, Armaganidis A, Cars O,  
116       Giamarellou H. 2009. Population Pharmacokinetic Analysis of Colistin  
117       Methanesulfonate and Colistin After Intravenous Administration in Critically Ill  
118       Patients With Infections Caused by Gram-Negative Bacteria. *Antimicrob Agents*  
119       *Chemother* Aug;53(8):3430-6.
- 120    10. Kato H, Hagihara M, Hirai J, Sakanashi D, Suematsu H, Nishiyama N, Koizumi Y,  
121       Yamagishi Y, Matsuura K, Mikamo H. 2017. Evaluation of Amikacin  
122       Pharmacokinetics and Pharmacodynamics for Optimal Initial Dosing Regimen.  
123       *Drugs R D* Mar;17(1):177-187.
- 124    11. Nakashima M, Uematsu T, Kanamaru M, Ueno K. 1992. Clinical phase 1 study of  
125       meropenem. *Chemotherapy* Apr;40(S-1):258-75.  
126       [http://fa.chemotherapy.or.jp/journal/jjc/40/Supplement1/40\\_258.pdf](http://fa.chemotherapy.or.jp/journal/jjc/40/Supplement1/40_258.pdf).
- 127    12. Sumita Y, Nouda H, Tada E, Kohzuki T, Kato M, Okuda T, Fukusawa M. 1992.  
128       Pharmacokinetics of meropenem, a new carbapenem antibiotics, parenterally



129 administered to laboratory animals. Chemotherapy Apr; 40(S-1): 123-131.

130 [http://fa.chemotherapy.or.jp/journal/jjc/40/Supplement1/40\\_123.pdf](http://fa.chemotherapy.or.jp/journal/jjc/40/Supplement1/40_123.pdf)
